# Supplementary material for: The synergism of Lactobacillaceae, inulin, polyglucose, and aerobic exercise ameliorates hyperglycemia by modulating the gut microbiota community and the metabolic profiles in db/db mice
Source: Royal Society of Chemistry journal article supplement (doi:10.1039/d3fo04642g), 2024-01-01
Supplement: d3fo04642g1.pdf [file d3fo04642g1.pdf]

## Supplementary Materials

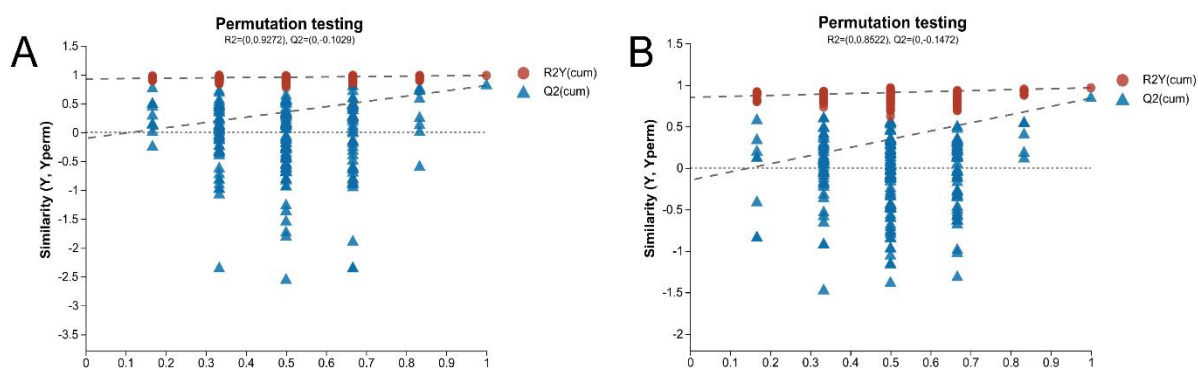

**Fig.S1** Permutation test results in positive and negative ion modes. Permutation test in positive (A) and negative (B) ion modes of the NC vs. MC groups.

**Table S1.** 104 differential metabolites between the MC group and the NC group.

| Ion modes | Metabolite                                       | ID          | Formula                                                          | MC/NC |
|-----------|--------------------------------------------------|-------------|------------------------------------------------------------------|-------|
| Negative  | Neohesperidin dihydrochalcone                    | HMDB0030542 | C <sub>28</sub> H <sub>36</sub> O <sub>15</sub>                  | ↑*    |
|           | Phenyllactic acid                                | C01479      | C <sub>9</sub> H <sub>10</sub> O <sub>3</sub>                    | ↑**   |
|           | Malic acid                                       | C00149      | C <sub>4</sub> H <sub>6</sub> O <sub>5</sub>                     | ↑*    |
|           | Asticolorin A                                    | HMDB0030133 | C <sub>33</sub> H <sub>30</sub> O <sub>7</sub>                   | ↑*    |
|           | Diazinon                                         | C14324      | C <sub>12</sub> H <sub>21</sub> N <sub>2</sub> O <sub>3</sub> PS | ↑*    |
|           | (2R)-1-O-beta-D-Galactopyranosylglycerol         | HMDB0038664 | C <sub>9</sub> H <sub>18</sub> O <sub>8</sub>                    | ↑*    |
|           | Hesperetin 7-(2,6-dirhamnosylglucoside)          | HMDB0040372 | C <sub>34</sub> H <sub>44</sub> O <sub>19</sub>                  | ↑*    |
|           | L-Tyrosine                                       | C00082      | C <sub>9</sub> H <sub>11</sub> NO <sub>3</sub>                   | ↓*    |
|           | Aminofurantoin                                   | HMDB0060589 | C <sub>8</sub> H <sub>8</sub> N <sub>4</sub> O <sub>3</sub>      | ↑**   |
|           | 6-(2-Hydroxyethoxy)-6-oxohexanoic acid           | HMDB0061681 | C <sub>8</sub> H <sub>14</sub> O <sub>5</sub>                    | ↑*    |
|           | N-acetyl-L-2-aminoadipate(2-)                    | HMDB0062715 | C <sub>8</sub> H <sub>13</sub> NO <sub>5</sub>                   | ↑*    |
|           | Erinapyrone A                                    | HMDB0041426 | C <sub>7</sub> H <sub>10</sub> O <sub>3</sub>                    | ↑**   |
|           | 1H-Indole-3-carboxaldehyde                       | C08493      | C <sub>9</sub> H <sub>7</sub> NO                                 | ↑***  |
|           | Mupirocin                                        | C11758      | C <sub>26</sub> H <sub>44</sub> O <sub>9</sub>                   | ↓**   |
|           | Phaseolic acid                                   | C10483      | C <sub>12</sub> H <sub>22</sub> O <sub>6</sub>                   | ↑***  |
|           | Talaromycin A                                    | HMDB0030143 | C <sub>12</sub> H <sub>22</sub> O <sub>4</sub>                   | ↑*    |
|           | 5-Hydroxyvalproic acid                           | C16650      | C <sub>8</sub> H <sub>16</sub> O <sub>3</sub>                    | ↑***  |
|           | (±)-3-Hydroxynonanoic acid                       | HMDB0031513 | C <sub>9</sub> H <sub>18</sub> O <sub>3</sub>                    | ↑*    |
|           | Jasmonic acid                                    | C08491      | C <sub>12</sub> H <sub>18</sub> O <sub>3</sub>                   | ↑*    |
|           | 2-Hydroxy-2,6,6-trimethylcyclohexanone           | HMDB0037023 | C <sub>9</sub> H <sub>16</sub> O <sub>2</sub>                    | ↑*    |
|           | Dihydrophaseic acid                              | C15971      | C <sub>15</sub> H <sub>22</sub> O <sub>5</sub>                   | ↑*    |
|           | Riesling acetal                                  | HMDB0037562 | C <sub>13</sub> H <sub>22</sub> O <sub>3</sub>                   | ↓*    |
|           | MG(20:5(5Z,8Z,11Z,14Z,17Z)/0:0/0:0)              | HMDB0011580 | C <sub>23</sub> H <sub>36</sub> O <sub>4</sub>                   | ↑*    |
|           | 6-Hydroxypentadecanedioic acid                   | HMDB0031885 | C <sub>15</sub> H <sub>28</sub> O <sub>5</sub>                   | ↓***  |
|           | 13(S)-HpODE                                      | C04717      | C <sub>18</sub> H <sub>32</sub> O <sub>4</sub>                   | ↑**   |
|           | 5-Tetradecenoic acid                             | HMDB0000499 | C <sub>14</sub> H <sub>26</sub> O <sub>2</sub>                   | ↑**   |
|           | Cyclomammecin                                    | HMDB0030711 | C <sub>22</sub> H <sub>28</sub> O <sub>6</sub>                   | ↓*    |
|           | MG(0:0/20:3(11Z,14Z,17Z)/0:0)                    | HMDB0011545 | C <sub>23</sub> H <sub>40</sub> O <sub>4</sub>                   | ↑*    |
|           | Coprocholic acid                                 | HMDB0000601 | C <sub>27</sub> H <sub>46</sub> O <sub>5</sub>                   | ↑*    |
|           | 3-Hydroxy-1-phenyl-1-octadecanone                | HMDB0035680 | C <sub>24</sub> H <sub>40</sub> O <sub>2</sub>                   | ↑*    |
|           | 9'-Carboxy-gamma-chromanol                       | HMDB0012868 | C <sub>23</sub> H <sub>36</sub> O <sub>4</sub>                   | ↑**   |
|           | 13-Hydroxy-9-methoxy-10-oxo-11-octadecenoic acid | HMDB0040901 | C <sub>19</sub> H <sub>34</sub> O <sub>5</sub>                   | ↑*    |
|           | LysoPC(22:1(13Z))                                | C04230      | C <sub>30</sub> H <sub>60</sub> NO <sub>7</sub> P                | ↑*    |
|           | Sorbitan laurate                                 | HMDB0029885 | C <sub>18</sub> H <sub>34</sub> O <sub>6</sub>                   | ↑*    |
|           | Oryzalexin E                                     | C21561      | C <sub>20</sub> H <sub>32</sub> O <sub>2</sub>                   | ↑***  |

|          |                                                                          |             |                                                                              |      |
|----------|--------------------------------------------------------------------------|-------------|------------------------------------------------------------------------------|------|
|          | 3-[2-(3,7-dimethylocta-2,6-dien-1-yl)-3,4-dihydroxyphenyl]propanoic acid | HMDB0134951 | C <sub>19</sub> H <sub>26</sub> O <sub>4</sub>                               | ↑*   |
|          | Dihydrojasmonic acid                                                     | HMDB0033601 | C <sub>12</sub> H <sub>20</sub> O <sub>3</sub>                               | ↑*** |
|          | Jasmolone                                                                | HMDB0030039 | C <sub>11</sub> H <sub>16</sub> O <sub>2</sub>                               | ↑**  |
|          | (5alpha,8beta,9beta)-5,9-Epoxy-3,6-megastigma dien-8-ol                  | HMDB0034672 | C <sub>13</sub> H <sub>20</sub> O <sub>2</sub>                               | ↓*   |
|          | Yangonin                                                                 | C09980      | C <sub>15</sub> H <sub>14</sub> O <sub>4</sub>                               | ↑*   |
|          | Asparaginy-Tyrosine                                                      | HMDB0028743 | C <sub>13</sub> H <sub>17</sub> N <sub>3</sub> O <sub>5</sub>                | ↑*** |
|          | Nookatone                                                                | HMDB0013687 | C <sub>15</sub> H <sub>22</sub> O                                            | ↑*   |
|          | 15d PGD2                                                                 | HMDB0060046 | C <sub>20</sub> H <sub>30</sub> O <sub>4</sub>                               | ↑**  |
|          | Eremopetasidione                                                         | HMDB0040778 | C <sub>14</sub> H <sub>20</sub> O <sub>3</sub>                               | ↑*   |
|          | (2E,4E)-2,7-Dimethyl-2,4-octadienedioic acid                             | HMDB0034099 | C <sub>10</sub> H <sub>14</sub> O <sub>4</sub>                               | ↑*   |
|          | (E)-10-Hydroxy-8-decenoic acid                                           | HMDB0039533 | C <sub>10</sub> H <sub>18</sub> O <sub>3</sub>                               | ↑*** |
|          | 5-(2-Furanyl)-1,2,3,4,5,6-hexahydro-7H-cyclopenta[b]pyridin-7-one        | HMDB0039656 | C <sub>12</sub> H <sub>13</sub> NO <sub>2</sub>                              | ↑**  |
|          | 1-(4-hydroxyphenyl)ethane-1,2-diol                                       | HMDB0135785 | C <sub>8</sub> H <sub>10</sub> O <sub>3</sub>                                | ↑*** |
|          | Hexyl glucoside                                                          | HMDB0031688 | C <sub>12</sub> H <sub>24</sub> O <sub>6</sub>                               | ↑**  |
|          | Beta-Thujaplicin                                                         | C09904      | C <sub>10</sub> H <sub>12</sub> O <sub>2</sub>                               | ↑*   |
|          | 5-Hydroxyindoleacetic acid                                               | C05635      | C <sub>10</sub> H <sub>9</sub> NO <sub>3</sub>                               | ↑*   |
|          | (1R,2R,3S,1'R)-Nepetalinic acid                                          | HMDB0034971 | C <sub>10</sub> H <sub>16</sub> O <sub>4</sub>                               | ↑*   |
|          | 3-Hydroxysebacic acid                                                    | HMDB0000350 | C <sub>10</sub> H <sub>18</sub> O <sub>5</sub>                               | ↑*** |
|          | (R)-2,7-Dihydroxy-2H-1,4-benzoxazin-3(4H)-one                            | HMDB0038054 | C <sub>8</sub> H <sub>7</sub> NO <sub>4</sub>                                | ↑*** |
|          | Cis-4-Hydroxycyclohexylacetic acid                                       | HMDB0000451 | C <sub>8</sub> H <sub>14</sub> O <sub>3</sub>                                | ↑*** |
|          | 3-(3,5-dimethoxyphenyl)propanoic acid                                    | HMDB0127493 | C <sub>11</sub> H <sub>14</sub> O <sub>4</sub>                               | ↑**  |
|          | Cis- and trans-2-Isopropyl-4-methyl-1,3-dioxolane                        | HMDB0032204 | C <sub>7</sub> H <sub>14</sub> O <sub>2</sub>                                | ↑**  |
|          | Nonate                                                                   | HMDB0011717 | C <sub>9</sub> H <sub>16</sub> O <sub>4</sub>                                | ↑*** |
|          | 4-Hydroxycyclohexylcarboxylic acid                                       | HMDB0001988 | C <sub>7</sub> H <sub>12</sub> O <sub>3</sub>                                | ↑**  |
|          | Methylsuccinic acid                                                      | C08645      | C <sub>5</sub> H <sub>8</sub> O <sub>4</sub>                                 | ↑*   |
|          | Valyl-Hydroxyproline                                                     | HMDB0029128 | C <sub>10</sub> H <sub>18</sub> N <sub>2</sub> O <sub>4</sub>                | ↑*   |
|          | Artocarbene                                                              | HMDB0031744 | C <sub>19</sub> H <sub>18</sub> O <sub>4</sub>                               | ↑*   |
|          | [(3-phenyloxiran-2-yl)methoxy]sulfonic acid                              | HMDB0135311 | C <sub>9</sub> H <sub>10</sub> O <sub>5</sub> S                              | ↓*   |
|          | Eujambolin                                                               | HMDB0037970 | C <sub>24</sub> H <sub>24</sub> O <sub>13</sub>                              | ↑*   |
|          | N-acetylaspartate                                                        | C01042      | C <sub>6</sub> H <sub>9</sub> NO <sub>5</sub>                                | ↑*   |
|          | 23-Hydroxyphysalolactone                                                 | HMDB0031388 | C <sub>28</sub> H <sub>39</sub> ClO <sub>9</sub>                             | ↑*   |
|          | Maltotetraose                                                            | C02052      | C <sub>24</sub> H <sub>42</sub> O <sub>21</sub>                              | ↑*   |
|          | Adenosine monophosphate                                                  | C01367      | C <sub>10</sub> H <sub>14</sub> N <sub>5</sub> O <sub>7</sub> P              | ↑*   |
|          | Temocapril                                                               | HMDB0061720 | C <sub>23</sub> H <sub>28</sub> N <sub>2</sub> O <sub>5</sub> S <sub>2</sub> | ↑*   |
|          | Succinic acid                                                            | C00042      | C <sub>4</sub> H <sub>6</sub> O <sub>4</sub>                                 | ↑**  |
| Positive | Sphingosine                                                              | C00319      | C <sub>18</sub> H <sub>37</sub> NO <sub>2</sub>                              | ↓*   |

|                                                  |             |                                                                  |      |
|--------------------------------------------------|-------------|------------------------------------------------------------------|------|
| Galactosylglycerol                               | C05401      | C <sub>9</sub> H <sub>18</sub> O <sub>8</sub>                    | ↑*   |
| 2,3-dihydrobenzofuran                            | HMDB0013815 | C <sub>8</sub> H <sub>8</sub> O                                  | ↑*** |
| 6-Dimethylaminopurine                            | HMDB0000473 | C <sub>7</sub> H <sub>9</sub> N <sub>5</sub>                     | ↑*   |
| OXYQUINOLINE                                     | C19434      | C <sub>9</sub> H <sub>7</sub> NO                                 | ↑*   |
| Palmitoyl Ethanolamide                           | C16512      | C <sub>18</sub> H <sub>37</sub> NO <sub>2</sub>                  | ↓*   |
| Glycylproline                                    | HMDB0000721 | C <sub>7</sub> H <sub>12</sub> N <sub>2</sub> O <sub>3</sub>     | ↑*   |
| Tyrosyl-Threonine                                | HMDB0029115 | C <sub>13</sub> H <sub>18</sub> N <sub>2</sub> O <sub>5</sub>    | ↑**  |
| N-Succinyl-L,L-2,6-diaminopimelate               | C04421      | C <sub>11</sub> H <sub>18</sub> N <sub>2</sub> O <sub>7</sub>    | ↑*   |
| L-alpha-Amino-1H-pyrrole-1-hexanoic acid         | HMDB0040551 | C <sub>10</sub> H <sub>16</sub> N <sub>2</sub> O <sub>2</sub>    | ↑*   |
| 2-hydroxyphenylpropionylglycine                  | HMDB0094723 | C <sub>11</sub> H <sub>13</sub> NO <sub>4</sub>                  | ↑**  |
| Cucurbit acid                                    | C08482      | C <sub>12</sub> H <sub>20</sub> O <sub>3</sub>                   | ↑*   |
| Glucosylsphingosine                              | C03108      | C <sub>24</sub> H <sub>47</sub> NO <sub>7</sub>                  | ↓**  |
| Gamma-Tocotrienol                                | C14155      | C <sub>28</sub> H <sub>42</sub> O <sub>2</sub>                   | ↓*   |
| 4-Hydroxy-3-(16-methylheptadecyl)-2H-pyran-2-one | HMDB0032093 | C <sub>23</sub> H <sub>40</sub> O <sub>3</sub>                   | ↓*   |
| 8-Dotriacontenoic acid                           | HMDB0029801 | C <sub>32</sub> H <sub>62</sub> O <sub>2</sub>                   | ↑*   |
| 3beta-20(29)-Lupene-3,27-diol                    | HMDB0035033 | C <sub>30</sub> H <sub>50</sub> O <sub>2</sub>                   | ↓*   |
| Methyl 2-(10-heptadecenyl)-6-hydroxybenzoate     | HMDB0038523 | C <sub>25</sub> H <sub>40</sub> O <sub>3</sub>                   | ↑*   |
| 3-ketosphingosine                                | C06121      | C <sub>18</sub> H <sub>35</sub> NO <sub>2</sub>                  | ↓*   |
| 5a-Cholestane-3a,7a,12a,25-tetrol                | HMDB0000520 | C <sub>27</sub> H <sub>48</sub> O <sub>4</sub>                   | ↑*   |
| 13-HDoHE                                         | HMDB0060043 | C <sub>22</sub> H <sub>34</sub> O                                | ↓*   |
| TetraHCA                                         | HMDB0062534 | C <sub>27</sub> H <sub>46</sub> O <sub>6</sub>                   | ↓*   |
| 3-Hydroxy-p-mentha-1,8-dien-7-al                 | HMDB0041584 | C <sub>10</sub> H <sub>14</sub> O <sub>2</sub>                   | ↑**  |
| Cibaric acid                                     | HMDB0038580 | C <sub>18</sub> H <sub>28</sub> O <sub>5</sub>                   | ↑*   |
| Tetrahydrocortisone                              | C05470      | C <sub>21</sub> H <sub>32</sub> O <sub>5</sub>                   | ↑*   |
| Lumichrome                                       | C01727      | C <sub>12</sub> H <sub>10</sub> N <sub>4</sub> O <sub>2</sub>    | ↑*** |
| D-Biotin                                         | C00120      | C <sub>10</sub> H <sub>16</sub> N <sub>2</sub> O <sub>3</sub> S  | ↑*   |
| Lotaustralin                                     | C08334      | C <sub>11</sub> H <sub>19</sub> NO <sub>6</sub>                  | ↑*   |
| 1-Carbapen-2-em-3-carboxylic acid                | C06669      | C <sub>7</sub> H <sub>7</sub> NO <sub>3</sub>                    | ↑*   |
| N-(1-Deoxy-1-fructosyl)valine                    | HMDB0037844 | C <sub>11</sub> H <sub>21</sub> NO <sub>7</sub>                  | ↑*** |
| Suberylglycine                                   | HMDB0000953 | C <sub>10</sub> H <sub>17</sub> NO <sub>5</sub>                  | ↑*   |
| Arginyl-Histidine                                | HMDB0028711 | C <sub>12</sub> H <sub>21</sub> N <sub>7</sub> O <sub>3</sub>    | ↑*   |
| (E)-10-Hydroxy-2-decene-4,6-diyonic acid         | HMDB0038965 | C <sub>10</sub> H <sub>10</sub> O <sub>3</sub>                   | ↑*   |
| Cytidine monophosphate N-acetylneuraminic acid   | C00128      | C <sub>20</sub> H <sub>31</sub> N <sub>4</sub> O <sub>16</sub> P | ↑*   |

The ↑ and ↓ in this table indicate up-regulation and down-regulation of metabolites. \* p < 0.05, \*\* p < 0.01, \*\*\* p < 0.001, \* represents significant difference between NC and MC groups;

**Table S2.** Metabolites altered by LIP, LIPA, and HIPA groups among the 104 differential metabolites between MC and NC groups

| Ion modes | Metabolite                               | ID         | Formula                                                          | superclass                       | MC/NC | LIP/MC | LIPA/MC | HIPA/MC |
|-----------|------------------------------------------|------------|------------------------------------------------------------------|----------------------------------|-------|--------|---------|---------|
| Negative  | Neohesperidin dihydrochalcone            | HMDB030542 | C <sub>28</sub> H <sub>36</sub> O <sub>15</sub>                  | Phenylpropanoids and polyketides | ↑*    | ↑+++   | ↑###    | ↑^^^    |
|           | Asticolorin A                            | HMDB030133 | C <sub>33</sub> H <sub>30</sub> O <sub>7</sub>                   | Organoheterocyclic compounds     | ↑*    | ↑      | ↑###    | ↑^^     |
|           | Diazinon                                 | C14324     | C <sub>12</sub> H <sub>21</sub> N <sub>2</sub> O <sub>3</sub> PS | Organic acids and derivatives    | ↑*    | ↓++    | ↓###    | ↓^^^    |
|           | (2R)-1-O-beta-D-Galactopyranosylglycerol | HMDB038664 | C <sub>9</sub> H <sub>18</sub> O <sub>8</sub>                    | Lipids and lipid-like molecules  | ↑*    | ↑      | ↑###    | ↑^^^    |
|           | Hesperetin 7-(2,6-dirhamnosylglucoside)  | HMDB040372 | C <sub>34</sub> H <sub>44</sub> O <sub>19</sub>                  | Phenylpropanoids and polyketides | ↑*    | ↑+++   | ↑###    | ↑^^^    |
|           | Aminofurantoin                           | HMDB060589 | C <sub>8</sub> H <sub>8</sub> N <sub>4</sub> O <sub>3</sub>      | Organoheterocyclic compounds     | ↑**   | ↓+++   | ↓       | ↓       |
|           | 6-(2-Hydroxyethoxy)-6-oxohexanoic acid   | HMDB061681 | C <sub>8</sub> H <sub>14</sub> O <sub>5</sub>                    | Lipids and lipid-like molecules  | ↑*    | ↓+++   | ↓       | ↓       |
|           | N-acetyl-L-2-aminoadipate(2-)            | HMDB062715 | C <sub>8</sub> H <sub>13</sub> NO <sub>5</sub>                   | Organic acids and derivatives    | ↑*    | ↓+++   | ↓###    | ↓^^^    |
|           | Erinapyrone A                            | HMDB041426 | C <sub>7</sub> H <sub>10</sub> O <sub>3</sub>                    | Organoheterocyclic compounds     | ↑**   | ↓+++   | ↓#      | ↓^      |
|           | 1H-Indole-3-carboxaldehyde               | C08493     | C <sub>9</sub> H <sub>7</sub> NO                                 | Organoheterocyclic compounds     | ↑***  | ↓++    | ↓###    | ↓^^^    |
|           | Mupirocin                                | C11758     | C <sub>26</sub> H <sub>44</sub> O <sub>9</sub>                   | Lipids and lipid-like molecules  | ↓**   | ↑++    | ↑       | ↑       |
|           | Phaseolic acid                           | C10483     | C <sub>12</sub> H <sub>22</sub> O <sub>6</sub>                   | Organic acids and derivatives    | ↑***  | ↓+++   | ↓###    | ↓^^^    |
|           | 5-Hydroxyvalproic acid                   | C16650     | C <sub>8</sub> H <sub>16</sub> O <sub>3</sub>                    | Lipids and lipid-like molecules  | ↑***  | ↓+++   | ↓##     | ↓^^     |
|           | (±)-3-Hydroxynonanoic acid               | HMDB031513 | C <sub>9</sub> H <sub>18</sub> O <sub>3</sub>                    | Organic acids and derivatives    | ↑*    | ↓+++   | ↓#      | ↓^^     |
|           | Jasmonic acid                            | C08491     | C <sub>12</sub> H <sub>18</sub> O <sub>3</sub>                   | Lipids and lipid-like molecules  | ↑*    | ↓      | ↓###    | ↓^^     |
|           | 2-Hydroxy-2,6,6-trimethylcyclohexanone   | HMDB037023 | C <sub>9</sub> H <sub>16</sub> O <sub>2</sub>                    | Organic oxygen compounds         | ↑*    | ↓+++   | ↓###    | ↓^^^    |
|           | Dihydrophaseic acid                      | C15971     | C <sub>15</sub> H <sub>22</sub> O <sub>5</sub>                   | Lipids and lipid-like molecules  | ↑*    | ↓+++   | ↓###    | ↓^^^    |
|           | 13(S)-HpODE                              | C04717     | C <sub>18</sub> H <sub>32</sub> O <sub>4</sub>                   | \                                | ↑**   | ↓+++   | ↓###    | ↓^^^    |
|           | Cyclomammecin                            | HMDB030711 | C <sub>22</sub> H <sub>28</sub> O <sub>6</sub>                   | Phenylpropanoids and polyketides | ↓*    | ↑+++   | ↑###    | ↑^^^    |

|                                                                   |             |                                                 |                                                                |                  |                  |                  |                  |
|-------------------------------------------------------------------|-------------|-------------------------------------------------|----------------------------------------------------------------|------------------|------------------|------------------|------------------|
| MG(0:0/20:3(11Z,14Z,17Z)/0:0)                                     | HMDB011545  | C <sub>23</sub> H <sub>40</sub> O <sub>4</sub>  | Lipids and lipid-like molecules                                | ↑*               | ↓                | ↓ <sup>#</sup>   | ↓ <sup>^</sup>   |
| Coprocholic acid                                                  | HMDB000601  | C <sub>27</sub> H <sub>46</sub> O <sub>5</sub>  | Lipids and lipid-like molecules                                | ↑*               | ↓ <sup>+++</sup> | ↓ <sup>###</sup> | ↓ <sup>^^^</sup> |
| 3-Hydroxy-1-phenyl-1-octadecanone                                 | HMDB0035680 | C <sub>24</sub> H <sub>40</sub> O <sub>2</sub>  | Lipids and lipid-like molecules                                | ↑*               | ↓ <sup>+++</sup> | ↓ <sup>###</sup> | ↓ <sup>^^^</sup> |
| 9'-Carboxy-gamma-chromanol                                        | HMDB0012868 | C <sub>23</sub> H <sub>36</sub> O <sub>4</sub>  | Organoheterocyclic compounds                                   | ↑ <sup>**</sup>  | ↑                | ↑ <sup>###</sup> | ↑ <sup>^^</sup>  |
| 13-Hydroxy-9-methoxy-10-oxo-11-octadecenoic acid                  | HMDB0040901 | C <sub>19</sub> H <sub>34</sub> O <sub>5</sub>  | Lipids and lipid-like molecules                                | ↑*               | ↓ <sup>+++</sup> | ↓ <sup>#</sup>   | ↓                |
| Oryzalexin E                                                      | C021561     | C <sub>20</sub> H <sub>32</sub> O <sub>2</sub>  | Benzenoids                                                     | ↑ <sup>***</sup> | ↑                | ↑ <sup>###</sup> | ↑ <sup>^^</sup>  |
| Dihydrojasmonic acid                                              | HMDB0033601 | C <sub>12</sub> H <sub>20</sub> O <sub>3</sub>  | Lipids and lipid-like molecules                                | ↑ <sup>***</sup> | ↓ <sup>+++</sup> | ↓ <sup>##</sup>  | ↓ <sup>^^</sup>  |
| Jasmolone                                                         | HMDB0030039 | C <sub>11</sub> H <sub>16</sub> O <sub>2</sub>  | Organic oxygen compounds                                       | ↑ <sup>**</sup>  | ↓                | ↓                | ↓ <sup>^</sup>   |
| Yangonin                                                          | C09980      | C <sub>15</sub> H <sub>14</sub> O <sub>4</sub>  | Phenylpropanoids and polyketides                               | ↑*               | ↓ <sup>++</sup>  | ↓ <sup>##</sup>  | ↓ <sup>^^</sup>  |
| Eremopetasidione                                                  | HMDB0040778 | C <sub>14</sub> H <sub>20</sub> O <sub>3</sub>  | Lipids and lipid-like molecules                                | ↑*               | ↓ <sup>++</sup>  | ↓ <sup>##</sup>  | ↓ <sup>^^</sup>  |
| (E)-10-Hydroxy-8-decenoic acid                                    | HMDB0039533 | C <sub>10</sub> H <sub>18</sub> O <sub>3</sub>  | Organic acids and derivatives                                  | ↑ <sup>***</sup> | ↓                | ↓ <sup>#</sup>   | ↓                |
| (2E,4E)-2,7-Dimethyl-2,4-octadienedioic acid                      | HMDB0034099 | C <sub>10</sub> H <sub>14</sub> O <sub>4</sub>  | Lipids and lipid-like molecules                                | ↑*               | ↓ <sup>+</sup>   | ↓                | ↓ <sup>^</sup>   |
| 5-(2-Furanyl)-1,2,3,4,5,6-hexahydro-7H-cyclopenta[b]pyridin-7-one | HMDB0039656 | C <sub>12</sub> H <sub>13</sub> NO <sub>2</sub> | Organoheterocyclic compounds                                   | ↑ <sup>**</sup>  | ↓ <sup>+++</sup> | ↓ <sup>###</sup> | ↓ <sup>^^^</sup> |
| Hexyl glucoside                                                   | HMDB0031688 | C <sub>12</sub> H <sub>24</sub> O <sub>6</sub>  | Lipids and lipid-like molecules                                | ↑ <sup>**</sup>  | ↓ <sup>+</sup>   | ↓ <sup>#</sup>   | ↓ <sup>^^</sup>  |
| Beta-Thujaplicin                                                  | C09904      | C <sub>10</sub> H <sub>12</sub> O <sub>2</sub>  | Hydrocarbon derivatives                                        | ↑*               | ↓ <sup>+++</sup> | ↓ <sup>###</sup> | ↓ <sup>^^^</sup> |
| 5-Hydroxyindoleacetic acid                                        | C05635      | C <sub>10</sub> H <sub>9</sub> NO <sub>3</sub>  | Organoheterocyclic compounds                                   | ↑*               | ↓ <sup>+++</sup> | ↓ <sup>###</sup> | ↓ <sup>^^^</sup> |
| (1R,2R,3S,1'R)-Nepetalinic acid                                   | HMDB0034971 | C <sub>10</sub> H <sub>16</sub> O <sub>4</sub>  | Lipids and lipid-like molecules                                | ↑*               | ↓ <sup>++</sup>  | ↓                | ↓ <sup>^</sup>   |
| 3-Hydroxysebacic acid                                             | HMDB0000350 | C <sub>10</sub> H <sub>18</sub> O <sub>5</sub>  | Organic acids and derivatives                                  | ↑ <sup>***</sup> | ↓ <sup>+++</sup> | ↓ <sup>#</sup>   | ↓ <sup>^</sup>   |
| (R)-2,7-Dihydroxy-2H-1,4-benzoxazin-3(4H)-one                     | HMDB0038054 | C <sub>8</sub> H <sub>7</sub> NO <sub>4</sub>   | Organoheterocyclic compounds, Phenylpropanoids and polyketides | ↑ <sup>***</sup> | ↓ <sup>+++</sup> | ↓ <sup>###</sup> | ↓ <sup>^^^</sup> |
| 3-(3,5-dimethoxyphenyl)propanoic acid                             | HMDB0031144 | C <sub>11</sub> H <sub>14</sub> O <sub>4</sub>  | Phenylpropanoids                                               | ↑ <sup>**</sup>  | ↓ <sup>+++</sup> | ↓                | ↓                |

|          |                                                   |              |                                                                              |                                         |      |                  |                  |      |
|----------|---------------------------------------------------|--------------|------------------------------------------------------------------------------|-----------------------------------------|------|------------------|------------------|------|
|          | henyl)propanoic acid                              | 127493       |                                                                              | and polyketides                         |      |                  |                  |      |
|          | Cis- and trans-2-Isopropyl-4-methyl-1,3-dioxolane | HMDB0032204  | C <sub>7</sub> H <sub>14</sub> O <sub>2</sub>                                | Organoheterocyclic compounds            | ↑**  | ↓ <sup>++</sup>  | ↓                | ↓^^  |
|          | Nonate                                            | HMDB0011717  | C <sub>9</sub> H <sub>16</sub> O <sub>4</sub>                                | Lipids and lipid-like molecules         | ↑*** | ↓ <sup>+++</sup> | ↓ <sup>##</sup>  | ↓^   |
|          | 4-Hydroxycyclohexylcarboxylic acid                | HMDB0001988  | C <sub>7</sub> H <sub>12</sub> O <sub>3</sub>                                | Organic oxygen compounds                | ↑**  | ↓ <sup>+++</sup> | ↓ <sup>###</sup> | ↓^^^ |
|          | Methylsuccinic acid                               | C08645       | C <sub>5</sub> H <sub>8</sub> O <sub>4</sub>                                 | Lipids and lipid-like molecules         | ↑*   | ↓ <sup>+++</sup> | ↓ <sup>##</sup>  | ↓^^^ |
|          | Valyl-Hydroxyproline                              | HMDB0029128  | C <sub>10</sub> H <sub>18</sub> N <sub>2</sub> O <sub>4</sub>                | Organic acids and derivatives           | ↑*   | ↓ <sup>+</sup>   | ↓ <sup>###</sup> | ↓^   |
|          | [(3-phenyloxiran-2-yl)methoxy]sulfonic acid       | HMDB00135311 | C <sub>9</sub> H <sub>10</sub> O <sub>5</sub> S                              | Benzenoids                              | ↓*   | ↓ <sup>+++</sup> | ↓ <sup>#</sup>   | ↓    |
|          | Eujambolin                                        | HMDB0037970  | C <sub>24</sub> H <sub>24</sub> O <sub>13</sub>                              | Phenylpropanoids and polyketides        | ↑*   | ↓ <sup>+++</sup> | ↓ <sup>##</sup>  | ↓^^  |
|          | N-acetylaspartate                                 | C01042       | C <sub>6</sub> H <sub>9</sub> NO <sub>5</sub>                                | \                                       | ↑*   | ↓ <sup>+++</sup> | ↓                | ↓^^  |
|          | Maltotetraose                                     | C02052       | C <sub>24</sub> H <sub>42</sub> O <sub>21</sub>                              | Organic oxygen compounds                | ↑*   | ↑ <sup>+++</sup> | ↑ <sup>###</sup> | ↑^^^ |
|          | Adenosine monophosphate                           | C01367       | C <sub>10</sub> H <sub>14</sub> N <sub>5</sub> O <sub>7</sub> P              | Nucleosides, nucleotides, and analogues | ↑*   | ↓ <sup>+++</sup> | ↓ <sup>###</sup> | ↓    |
|          | Temocapril                                        | HMDB0061720  | C <sub>23</sub> H <sub>28</sub> N <sub>2</sub> O <sub>5</sub> S <sub>2</sub> | Organic acids and derivatives           | ↑*   | ↓ <sup>+++</sup> | ↓ <sup>###</sup> | ↓^^^ |
| Positive | Sphingosine                                       | C00319       | C <sub>18</sub> H <sub>37</sub> NO <sub>2</sub>                              | Organic nitrogen compounds              | ↓*   | ↑ <sup>+++</sup> | ↑ <sup>###</sup> | ↑    |
|          | Galactosylglycerol                                | C05401       | C <sub>9</sub> H <sub>18</sub> O <sub>8</sub>                                | Lipids and lipid-like molecules         | ↑*   | ↑                | ↑ <sup>###</sup> | ↑^^^ |
|          | 6-Dimethylaminopurine                             | HMDB0000473  | C <sub>7</sub> H <sub>9</sub> N <sub>5</sub>                                 | Organoheterocyclic compounds            | ↑*   | ↓ <sup>+++</sup> | ↓                | ↓^^  |
|          | OXYQUINOLINE                                      | C19434       | C <sub>9</sub> H <sub>7</sub> NO                                             | \                                       | ↑*   | ↓ <sup>+</sup>   | ↓ <sup>###</sup> | ↓^^  |
|          | Palmitoyl Ethanolamide                            | C16512       | C <sub>18</sub> H <sub>37</sub> NO <sub>2</sub>                              | \                                       | ↓*   | ↓ <sup>+++</sup> | ↓                | ↓    |
|          | Glycylproline                                     | HMDB0000721  | C <sub>7</sub> H <sub>12</sub> N <sub>2</sub> O <sub>3</sub>                 | Organic acids and derivatives           | ↑*   | ↓ <sup>++</sup>  | ↓ <sup>#</sup>   | ↓^^  |
|          | Tyrosyl-Threonine                                 | HMDB0029115  | C <sub>13</sub> H <sub>18</sub> N <sub>2</sub> O <sub>5</sub>                | Organic acids and derivatives           | ↑**  | ↓ <sup>++</sup>  | ↓ <sup>##</sup>  | ↓^^  |
|          | N-Succinyl-L,L-2,6-diaminopimelate                | C04421       | C <sub>11</sub> H <sub>18</sub> N <sub>2</sub> O <sub>7</sub>                | Organic acids and derivatives           | ↑*   | ↓ <sup>++</sup>  | ↓                | ↓^^^ |
|          | L-alpha-Amino-1H-pyrrole-1-hexan                  | HMDB0040551  | C <sub>10</sub> H <sub>16</sub> N <sub>2</sub> O <sub>2</sub>                | Organic acids and derivatives           | ↑*   | ↓ <sup>++</sup>  | ↓ <sup>##</sup>  | ↓^^^ |

oic acid

|                                          |             |                                                               |                                 |      |      |      |      |
|------------------------------------------|-------------|---------------------------------------------------------------|---------------------------------|------|------|------|------|
| 2-hydroxyphenylpropionylglycine          | HMDB0094723 | C <sub>11</sub> H <sub>13</sub> NO <sub>4</sub>               | Organic acids and derivatives   | ↑**  | ↓    | ↓##  | ↓^^  |
| 8-Dotriacontenoic acid                   | HMDB0029801 | C <sub>32</sub> H <sub>62</sub> O <sub>2</sub>                | Lipids and lipid-like molecules | ↑*   | ↓++  | ↓##  | ↓^^  |
| 3-ketosphingosine                        | C06121      | C <sub>18</sub> H <sub>35</sub> NO <sub>2</sub>               | \                               | ↓*   | ↑+++ | ↑##  | ↑^^^ |
| 5a-Cholestane-3a,7a,12a,25-tetrol        | HMDB0000520 | C <sub>27</sub> H <sub>48</sub> O <sub>4</sub>                | Lipids and lipid-like molecules | ↑*   | ↓+++ | ↓##  | ↓    |
| TetraHCA                                 | HMDB0062534 | C <sub>27</sub> H <sub>46</sub> O <sub>6</sub>                | Lipids and lipid-like molecules | ↓*   | ↓+++ | ↓### | ↓^^^ |
| 3-Hydroxy-p-mentha-1,8-dien-7-al         | HMDB0041584 | C <sub>10</sub> H <sub>14</sub> O <sub>2</sub>                | Lipids and lipid-like molecules | ↑**  | ↓++  | ↓##  | ↓^^  |
| Lumichrome                               | C01727      | C <sub>12</sub> H <sub>10</sub> N <sub>4</sub> O <sub>2</sub> | \                               | ↑*** | ↓+++ | ↓#   | ↓    |
| Lotaustralin                             | C08334      | C <sub>11</sub> H <sub>19</sub> NO <sub>6</sub>               | Organic oxygen compounds        | ↑*   | ↓+++ | ↓### | ↓^^^ |
| Suberylglycine                           | HMDB0000953 | C <sub>10</sub> H <sub>17</sub> NO <sub>5</sub>               | Organic acids and derivatives   | ↑*   | ↓    | ↓#   | ↓^   |
| Arginyl-Histidine                        | HMDB0028711 | C <sub>12</sub> H <sub>21</sub> N <sub>7</sub> O <sub>3</sub> | Organic acids and derivatives   | ↑*   | ↓+++ | ↓### | ↓^^^ |
| (E)-10-Hydroxy-2-decene-4,6-dienoic acid | HMDB0038965 | C <sub>10</sub> H <sub>10</sub> O <sub>3</sub>                | Lipids and lipid-like molecules | ↑*   | ↓    | ↓##  | ↓    |

The ↑ and ↓ in this table indicate up-regulation and down-regulation of metabolites. \* p < 0.05, \*\* p < 0.01, \*\*\* p < 0.001 \* represents significant difference between NC and MC groups; +p < 0.05, ++p < 0.01, +++p < 0.001, + represents significant difference between LIP and MC groups; # p < 0.05, ## p < 0.01, ### p < 0.001, # represents significant difference between LIPA and MC groups; ^ p < 0.05, ^^ p < 0.01, ^^ p < 0.001, ^ represents significant difference between HIPA and MC groups.
